# Supplementary material for: Implementation Strategies Used to Increase Human Papillomavirus Vaccination Uptake by Adolescent Girls in Sub-Saharan Africa: A Scoping Review
Source: MDPI journal article supplement (doi:10.3390/vaccines11071246), 2023-07-16
Supplement: s1 [file s1]

**Table S1.** PubMed search strategy. PubMed Search 26.01.2022.

| Search | Actions | Details | Query                                                                                                                                                                                                                                                                                                                                                                                                                                                                                                                                                                                                                                                                                                                                                                                                                                               | Results   | Time     |
|--------|---------|---------|-----------------------------------------------------------------------------------------------------------------------------------------------------------------------------------------------------------------------------------------------------------------------------------------------------------------------------------------------------------------------------------------------------------------------------------------------------------------------------------------------------------------------------------------------------------------------------------------------------------------------------------------------------------------------------------------------------------------------------------------------------------------------------------------------------------------------------------------------------|-----------|----------|
| #6     |         |         | Search: (((#1) AND (#2)) AND (#3)) AND (#4)) AND (#5)                                                                                                                                                                                                                                                                                                                                                                                                                                                                                                                                                                                                                                                                                                                                                                                               | 142       | 07:38:37 |
| #5     |         |         | Search: (((((((((((((((((((((((((((((((((((((((sub-Saharan Africa) OR (Africa south Sahara)) OR (SSA)) OR (Angola)) OR (Benin)) OR (Burkina Faso)) OR (Botswana)) OR (Burundi)) OR (Cameroon)) OR (Cape Verde)) OR (Central Africa Republic)) OR (Chad)) OR (Congo)) OR (Cote d'voire)) OR (Djibouti)) OR (Eritrea)) OR (Ethiopia)) OR (The Gambia)) OR (Ghana)) OR (Guinea)) OR (Guinea-Bissau)) OR (Gabon)) OR (Kenya)) OR (Lesotho)) OR (Liberia)) OR (Madagascar)) OR (Malawi)) OR (Mali)) OR (Mauritania)) OR (Mauritius)) OR (Mozambique)) OR (Namibia)) OR (Niger)) OR (Nigeria)) OR (Rwanda)) OR (Sao tome principle)) OR (Senegal)) OR (seychelles)) OR (sierra Leon)) OR (Somalia)) OR (South Africa)) OR (Sudan)) OR (south Sudan)) OR (Swaziland)) OR (United republic of Tanzania)) OR (Togo)) OR (Uganda)) OR (Zimbabwe)) OR (Zambia) | 635,885   | 07:37:13 |
| #4     |         |         | Search: (Uptake) OR (coverage)                                                                                                                                                                                                                                                                                                                                                                                                                                                                                                                                                                                                                                                                                                                                                                                                                      | 565,814   | 07:35:27 |
| #3     |         |         | Search: ((Human papillomavirus vaccination) OR (HPV vaccination)) OR (HPV immunization)                                                                                                                                                                                                                                                                                                                                                                                                                                                                                                                                                                                                                                                                                                                                                             | 18,234    | 07:34:36 |
| #2     |         |         | Search: (Implementation strategies) OR (interventions)                                                                                                                                                                                                                                                                                                                                                                                                                                                                                                                                                                                                                                                                                                                                                                                              | 9,425,631 | 07:33:47 |
| #1     |         |         | Search: ((((((Girls) OR (parents)) OR (Teachers)) OR (Health care providers)) OR (health professionals)) OR (doctors)) OR (nurses)                                                                                                                                                                                                                                                                                                                                                                                                                                                                                                                                                                                                                                                                                                                  | 3,168,662 | 07:31:21 |

**Table S2.** PRISMA-ScR checklist. Preferred Reporting Items for Systematic Reviews and Meta-Analyses extension for Scoping Reviews (PRISMA-ScR) Checklist.

| SECTION                   | ITEM | PRISMA-ScR CHECKLIST ITEM                                                                                                                                                                                                                                                                                         | REPORTED ON PAGE # |
|---------------------------|------|-------------------------------------------------------------------------------------------------------------------------------------------------------------------------------------------------------------------------------------------------------------------------------------------------------------------|--------------------|
| <b>TITLE</b>              |      |                                                                                                                                                                                                                                                                                                                   |                    |
| Title                     | 1    | Implementation strategies used to increase human papillomavirus vaccination uptake by adolescent girls in sub-Saharan Africa: A scoping review                                                                                                                                                                    | 1                  |
| <b>ABSTRACT</b>           |      |                                                                                                                                                                                                                                                                                                                   |                    |
| Structured summary        | 2    | Abstract provided                                                                                                                                                                                                                                                                                                 | 1                  |
| <b>INTRODUCTION</b>       |      |                                                                                                                                                                                                                                                                                                                   |                    |
| Rationale                 | 3    | This review provides a basis for future research on increasing the uptake of the HPV vaccine by adolescent girls as we reported importance and feasibility of interventions.                                                                                                                                      | 4                  |
| Objectives                | 4    | To identify implementation strategies used to increase HPV vaccination uptake by adolescent girls in sub-Saharan Africa, report their importance and feasibility using the Expert recommendation for implementation change compilation, and form a basis for future systematic reviews to evaluate effectiveness. | 4                  |
| <b>METHODS</b>            |      |                                                                                                                                                                                                                                                                                                                   |                    |
| Protocol and registration | 5    | Protocol was published:<br>Lubeya MK, Mwanahamuntu M, Chibwasha C, Mukosha M, Wamunyima MM, Kawonga M. Implementation strategies to increase human papillomavirus vaccination uptake for adolescent girls in sub-Saharan Africa: A scoping review protocol. PloS one.                                             | 5                  |

|                                                                          |    |                                                                                                                                                                                                                                                                         |               |                                           |
|--------------------------------------------------------------------------|----|-------------------------------------------------------------------------------------------------------------------------------------------------------------------------------------------------------------------------------------------------------------------------|---------------|-------------------------------------------|
| 2022;17(8):e0267617. Epub 2022/08/26. doi: 10.1371/journal.pone.0267617. |    |                                                                                                                                                                                                                                                                         |               |                                           |
| Eligibility criteria                                                     | 6  | We captured all research papers published in English on implementation strategies including various stakeholders (parents, adolescent girls, teachers, and community leaders between January 2006 and December 2021.                                                    | 5             |                                           |
| Information sources*                                                     | 7  | The databases searched included: PubMed, EMBASE, CINAHL (Cumulative Index to Nursing and Allied Health Literature) (EBSCO), Google Scholar, and Scopus. Gray literature citations were also searched including Google Scholar.                                          | 5             |                                           |
| Search                                                                   | 8  | Provided as S1                                                                                                                                                                                                                                                          | S1 Appendix 1 |                                           |
| Selection of sources of evidence†                                        | 9  | Two independent reviewers assessed articles for inclusion by screening titles, abstracts, and full text.                                                                                                                                                                | 7             |                                           |
| Data charting process‡                                                   | 10 | The data extracted include details about the participants, concept, context, study methods, and key findings relevant to the review question. The draft charting tool was piloted on five included articles, and revisions were made as necessary during data charting. | 7             |                                           |
| Data items                                                               | 11 | Table 1                                                                                                                                                                                                                                                                 | 8             |                                           |
| Critical appraisal of individual sources of evidence§                    | 12 | NA                                                                                                                                                                                                                                                                      | NA            |                                           |
| Synthesis of results                                                     | 13 | The extracted data have been presented in Tables and supplementary files to align with the study objectives, accompanied by a narrative summary of how the findings relate to the research question and objectives.                                                     | 8             |                                           |
| Selection of sources of evidence                                         | 14 | <b>RESULTS</b>                                                                                                                                                                                                                                                          |               | <a href="#">Click here to enter text.</a> |
| Characteristics of sources of evidence                                   | 15 |                                                                                                                                                                                                                                                                         |               | <a href="#">Click here to enter text.</a> |
| Critical appraisal within sources of evidence                            | 16 |                                                                                                                                                                                                                                                                         |               | <a href="#">Click here to enter text.</a> |
| Results of individual sources of evidence                                | 17 |                                                                                                                                                                                                                                                                         |               | <a href="#">Click here to enter text.</a> |
| Synthesis of results                                                     | 18 |                                                                                                                                                                                                                                                                         |               | <a href="#">Click here to enter text.</a> |
| Summary of evidence                                                      | 19 | <b>DISCUSSION</b><br>We identified and mapped implementation strategies to increase HPV vaccination uptake for adolescent girls in sub-Saharan Africa according to ERIC compilation and reported their importance and feasibility.                                      | 18            |                                           |
| Limitations                                                              | 20 | This scoping review only focused on studies carried out in English and may have missed other important research in other languages. Furthermore, there are limitations inherent to the scoping review methodology itself.                                               | 20            |                                           |
| Conclusions                                                              | 21 |                                                                                                                                                                                                                                                                         | 21            |                                           |
| Funding                                                                  | 22 | <b>FUNDING</b><br>MKL and MM are supported by the UNC-UNZA-Wits Partnership for HIV and Women's Reproductive Health Grant number: D43 TW010558.                                                                                                                         | 22            |                                           |

JBIG = Joanna Briggs Institute; PRISMA-ScR = Preferred Reporting Items for Systematic Reviews and Meta-Analyses extension for Scoping Reviews.

\* Where *sources of evidence* (see second footnote) are compiled from, such as bibliographic databases, social media platforms, and Web sites.

† A more inclusive/heterogeneous term used to account for the different types of evidence or data sources (e.g., quantitative and/or qualitative research, expert opinion, and policy documents) that may be eligible in a scoping review instead of only studies. This is not to be confused with *information sources* (see first footnote).

‡ The frameworks by Arksey and O'Malley (6) and Levac et al. (7) and the JBI guidance (4, 5) refer to the process of data extraction in a scoping review as data charting.

§ The process of systematically examining research evidence to assess its validity, results, and relevance before using it to inform a decision. This term is used for items 12 and 19 instead of "risk of bias" (which is more applicable to systematic reviews of

interventions) to include and acknowledge the various sources of evidence that may be used in a scoping review (e.g., quantitative and/or qualitative research, expert opinion, and policy document).

*From:* Tricco AC, Lillie E, Zarin W, O'Brien KK, Colquhoun H, Levac D et al. PRISMA Extension for Scoping Reviews (PRISMA-ScR): Checklist and Explanation. *Ann Intern Med.* 2018;169:467–473. doi: 10.7326/M18-0850.

**Table S3.** Identified strategies per study according to ERIC compilation.

| S<br>N | Imple-<br>menta-<br>tion<br>strategy<br>(ERIC)    | Definition                                                                                                                                                                                                | Bina<br>gwah<br>o,<br>Ag-<br>nes<br>(2012<br>) | LaMo<br>nta-<br>gne, D<br>Scott<br>(2011) | Wat-<br>son,<br>Deb-<br>orah<br>(2012) | Casey,<br>Rabec-<br>ca M<br>(2021) | Galaga<br>n, Sean<br>R<br>(2013) | Raes-<br>ima,<br>o M<br>(2015) | Gal-<br>laghe<br>r, Kath-<br>erine<br>(2017<br>) | Lad-<br>ner, Joel<br>(2012) | Chigbui<br>ke O<br>(2017) | World<br>Health<br>Or-<br>gani-<br>za-<br>tion<br>(2015<br>) | Ka-<br>bakam<br>a, Sev-<br>erin<br>(2016) | Moodle<br>y, I<br>(2013) | Wama<br>i, Rich-<br>ard<br>(2012) | Msya<br>mboza<br>, Kelias<br>P<br>(2017) | Mugi<br>sha, Em-<br>man-<br>uel<br>(2015) | Tsu,<br>Vivie<br>n, Leon<br>(2021<br>) | Snyrna<br>n, Leon<br>(2015) | Whir-<br>twort<br>h, Hil-<br>ary<br>(2021<br>) | Dro-<br>tkow,<br>Em-<br>manuel<br>(2021<br>) | Mpur<br>u, Alex<br>(2021) | Lad-<br>ner, Joe<br>(2016) | Soi,<br>Cath-<br>erine<br>(2018) | Delany-<br>Muret<br>we<br>(2018) | LaMo<br>nta-<br>gne,<br>Scott<br>D<br>(2021) | En-<br>gel,<br>Dan-<br>ielle<br>(2021) | Jone<br>s, Amy<br>(2021) | PAT<br>H,<br>(2011<br>) | Min-<br>istry<br>of<br>Health<br>Zam-<br>bia<br>(2013) | To-<br>tal<br>time<br>s<br>strat-<br>egy<br>used |    |
|--------|---------------------------------------------------|-----------------------------------------------------------------------------------------------------------------------------------------------------------------------------------------------------------|------------------------------------------------|-------------------------------------------|----------------------------------------|------------------------------------|----------------------------------|--------------------------------|--------------------------------------------------|-----------------------------|---------------------------|--------------------------------------------------------------|-------------------------------------------|--------------------------|-----------------------------------|------------------------------------------|-------------------------------------------|----------------------------------------|-----------------------------|------------------------------------------------|----------------------------------------------|---------------------------|----------------------------|----------------------------------|----------------------------------|----------------------------------------------|----------------------------------------|--------------------------|-------------------------|--------------------------------------------------------|--------------------------------------------------|----|
| 1      | Access<br>new fund-<br>ing                        | Access<br>new or ex-<br>isting<br>money to<br>facilitate<br>the imple-<br>mentation                                                                                                                       | 1                                              | 1                                         | 1                                      | 1                                  | 0                                | 1                              | 1                                                | 1                           | 0                         | 1                                                            | 0                                         | 1                        | 0                                 | 1                                        | 0                                         | 1                                      | 1                           | 1                                              | 0                                            | 1                         | 1                          | 1                                | 1                                | 1                                            | 1                                      | 1                        | 0                       | 1                                                      | 1                                                | 21 |
| 2      | Alter in-<br>centive/al-<br>lowance<br>structures | Work to<br>incentivize<br>the adop-<br>tion and<br>implemen-<br>tation of<br>the clinical<br>innovation                                                                                                   | 0                                              | 0                                         | 0                                      | 0                                  | 0                                | 0                              | 0                                                | 0                           | 0                         | 0                                                            | 0                                         | 0                        | 0                                 | 0                                        | 0                                         | 0                                      | 0                           | 0                                              | 0                                            | 0                         | 0                          | 0                                | 0                                | 0                                            | 0                                      | 0                        | 0                       | 0                                                      | 0                                                | 0  |
| 3      | Alter pa-<br>tient/con-<br>sumer<br>fees          | Create fee<br>structures<br>where pa-<br>tients/con-<br>sumers<br>pay less<br>for pre-<br>ferred<br>treatments<br>(the clini-<br>cal inno-<br>vation)<br>and more<br>for less-<br>preferred<br>treatments | 0                                              | 0                                         | 0                                      | 0                                  | 0                                | 0                              | 0                                                | 0                           | 0                         | 0                                                            | 0                                         | 0                        | 0                                 | 0                                        | 0                                         | 0                                      | 0                           | 0                                              | 0                                            | 0                         | 0                          | 0                                | 0                                | 0                                            | 0                                      | 0                        | 0                       | 0                                                      | 0                                                | 0  |



|   |                                   |                                                                                                                                                               |   |   |   |   |   |   |   |   |   |   |   |   |   |   |   |   |   |   |   |   |   |   |   |   |   |   |   |   |           |
|---|-----------------------------------|---------------------------------------------------------------------------------------------------------------------------------------------------------------|---|---|---|---|---|---|---|---|---|---|---|---|---|---|---|---|---|---|---|---|---|---|---|---|---|---|---|---|-----------|
| 7 | Capture and share local knowledge | Capture local knowledge from implementation sites on how implementers and clinicians made something work in their setting, and then share it with other sites | 0 | 0 | 0 | 1 | 0 | 1 | 0 | 1 | 0 | 0 | 1 | 1 | 0 | 0 | 1 | 1 | 1 | 0 | 0 | 1 | 1 | 0 | 0 | 0 | 1 | 0 | 1 | 0 | <b>12</b> |
|   |                                   |                                                                                                                                                               |   |   |   |   |   |   |   |   |   |   |   |   |   |   |   |   |   |   |   |   |   |   |   |   |   |   |   |   |           |
| 8 | Centralize technical assistance   | Develop and use a centralized system to deliver technical assistance focused on implementation issues                                                         | 1 | 0 | 1 | 1 | 0 | 1 | 1 | 0 | 0 | 0 | 0 | 1 | 0 | 1 | 1 | 1 | 0 | 1 | 0 | 1 | 1 | 1 | 0 | 1 | 1 | 0 | 1 | 1 | <b>17</b> |
|   |                                   |                                                                                                                                                               |   |   |   |   |   |   |   |   |   |   |   |   |   |   |   |   |   |   |   |   |   |   |   |   |   |   |   |   |           |

[illegible]

|    |                                         |                                                                                                                                                                                                   |   |   |   |   |   |   |   |   |   |   |   |   |   |   |   |   |   |   |   |   |   |   |   |   |   |   |   |   |    |
|----|-----------------------------------------|---------------------------------------------------------------------------------------------------------------------------------------------------------------------------------------------------|---|---|---|---|---|---|---|---|---|---|---|---|---|---|---|---|---|---|---|---|---|---|---|---|---|---|---|---|----|
| 11 | Change physical structure and equipment | Evaluate current configurations and adapt, as needed, the physical structure and/or equipment (e.g., changing the layout of a room, adding equipment) to best accommodate the targeted innovation | 0 | 1 | 0 | 0 | 0 | 0 | 0 | 0 | 0 | 0 | 0 | 1 | 0 | 0 | 0 | 0 | 0 | 0 | 0 | 0 | 1 | 0 | 0 | 0 | 0 | 0 | 1 | 1 | 5  |
| 12 | Change record systems                   | Change record systems to allow for better assessment of implementation or clinical outcomes                                                                                                       | 0 | 0 | 0 | 0 | 0 | 0 | 0 | 0 | 0 | 0 | 0 | 0 | 0 | 0 | 0 | 0 | 0 | 0 | 0 | 1 | 0 | 1 | 0 | 0 | 0 | 0 | 0 | 0 | 2  |
| 13 | Change service sites                    | Change the location of clinical service sites to increase access                                                                                                                                  | 1 | 1 | 1 | 1 | 0 | 1 | 1 | 1 | 0 | 1 | 1 | 1 | 1 | 1 | 1 | 1 | 1 | 0 | 1 | 1 | 1 | 1 | 1 | 1 | 1 | 0 | 1 | 1 | 24 |



|    |                                                                                                                                                                                                                                                                                                                                                                                           |   |   |   |   |   |   |   |   |   |   |   |   |   |   |   |   |   |   |   |   |   |   |   |   |   |   |   |   |   |
|----|-------------------------------------------------------------------------------------------------------------------------------------------------------------------------------------------------------------------------------------------------------------------------------------------------------------------------------------------------------------------------------------------|---|---|---|---|---|---|---|---|---|---|---|---|---|---|---|---|---|---|---|---|---|---|---|---|---|---|---|---|---|
| 14 | <p>Implement changes in a cyclical fashion using small tests of change before taking changes system-wide. Tests of change benefit from systematic measurement, and results of the tests of change are studied for insights on how to perform better. This process continues serially over time, and refinement is added with each cycle</p> <p>Conduct cyclical small tests of change</p> | 0 | 0 | 0 | 0 | 0 | 0 | 0 | 0 | 0 | 0 | 1 | 0 | 0 | 0 | 1 | 1 | 1 | 1 | 0 | 1 | 1 | 0 | 0 | 0 | 0 | 0 | 0 | 1 | 8 |
|----|-------------------------------------------------------------------------------------------------------------------------------------------------------------------------------------------------------------------------------------------------------------------------------------------------------------------------------------------------------------------------------------------|---|---|---|---|---|---|---|---|---|---|---|---|---|---|---|---|---|---|---|---|---|---|---|---|---|---|---|---|---|

|    |                                     |                                                                                                                                                                                                                                              |   |   |   |   |   |   |   |   |   |   |   |   |   |   |   |   |   |   |   |   |   |   |   |   |   |   |   |    |    |
|----|-------------------------------------|----------------------------------------------------------------------------------------------------------------------------------------------------------------------------------------------------------------------------------------------|---|---|---|---|---|---|---|---|---|---|---|---|---|---|---|---|---|---|---|---|---|---|---|---|---|---|---|----|----|
| 15 | Conduct educational meetings        | Hold meetings targeted toward different stakeholder groups ( <i>e.g.</i> , providers, administrators, other organizational stakeholders and community, patient/consumer and family stakeholders) to teach them about the clinical innovation | 1 | 1 | 1 | 1 | 1 | 1 | 1 | 1 | 0 | 1 | 1 | 0 | 0 | 0 | 1 | 1 | 1 | 1 | 1 | 1 | 1 | 1 | 1 | 1 | 0 | 1 | 1 | 23 |    |
| 16 | Conduct educational outreach visits | Have a trained person meet with providers in their practice settings to educate providers about the clinical innovation with the intent of changing the provider's practice                                                                  | 0 | 0 | 0 | 1 | 0 | 1 | 0 | 1 | 1 | 0 | 0 | 1 | 1 | 0 | 1 | 1 | 0 | 1 | 0 | 1 | 1 | 1 | 1 | 1 | 1 | 0 | 1 | 0  | 16 |

|    |                                     |                                                                                                                                                                                     |   |   |   |   |   |   |   |   |   |   |   |   |   |   |   |   |   |   |   |   |   |   |   |   |   |   |   |   |   |   |   |    |    |
|----|-------------------------------------|-------------------------------------------------------------------------------------------------------------------------------------------------------------------------------------|---|---|---|---|---|---|---|---|---|---|---|---|---|---|---|---|---|---|---|---|---|---|---|---|---|---|---|---|---|---|---|----|----|
| 17 | Conduct local consensus discussions | Include local providers and other stakeholders in discussions that address whether the chosen problem is important and whether the clinical innovation to address it is appropriate | 1 | 0 | 1 | 1 | 1 | 1 | 0 | 1 | 1 | 0 | 1 | 1 | 0 | 0 | 0 | 1 | 1 | 1 | 0 | 1 | 1 | 1 | 1 | 1 | 0 | 1 | 1 | 1 | 0 | 1 | 1 | 20 |    |
| 18 | Conduct local needs assessment      | Collect and analyze data related to the need for the innovation                                                                                                                     | 1 | 0 | 0 | 1 | 0 | 1 | 0 | 0 | 1 | 0 | 0 | 0 | 0 | 0 | 1 | 1 | 0 | 0 | 0 | 1 | 0 | 1 | 1 | 1 | 0 | 0 | 1 | 1 | 0 | 0 | 1 | 1  | 12 |
| 19 | Conduct ongoing training            | Plan for and conduct training in the clinical innovation in an ongoing way                                                                                                          | 0 | 0 | 1 | 1 | 0 | 0 | 0 | 0 | 1 | 0 | 0 | 0 | 0 | 0 | 1 | 1 | 0 | 0 | 0 | 1 | 1 | 0 | 0 | 1 | 1 | 0 | 1 | 1 | 0 | 1 | 1 | 11 |    |

[illegible]

[illegible]

|                                                                                                                               |                                                                                                                                                                                                                                                |   |   |   |   |   |   |   |   |   |   |   |   |   |   |   |   |   |   |   |   |   |   |   |   |   |   |   |   |    |
|-------------------------------------------------------------------------------------------------------------------------------|------------------------------------------------------------------------------------------------------------------------------------------------------------------------------------------------------------------------------------------------|---|---|---|---|---|---|---|---|---|---|---|---|---|---|---|---|---|---|---|---|---|---|---|---|---|---|---|---|----|
| Develop a formal implementation blueprint that includes all goals and strategies. The blueprint should include the following: |                                                                                                                                                                                                                                                |   |   |   |   |   |   |   |   |   |   |   |   |   |   |   |   |   |   |   |   |   |   |   |   |   |   |   |   |    |
| 1) aim/purpose of the implementation; 2) scope of                                                                             |                                                                                                                                                                                                                                                |   |   |   |   |   |   |   |   |   |   |   |   |   |   |   |   |   |   |   |   |   |   |   |   |   |   |   |   |    |
| 23                                                                                                                            | Develop a formal implementation blueprint (e.g., what organizational units are affected); 3) timeframe and milestones; and 4) appropriate performance/progress measures. Use and update this plan to guide the implementation effort over time | 1 | 0 | 0 | 1 | 0 | 1 | 0 | 1 | 1 | 0 | 0 | 1 | 0 | 0 | 0 | 1 | 1 | 0 | 0 | 1 | 0 | 1 | 1 | 1 | 0 | 0 | 1 | 0 | 13 |

[illegible]

|    |                                                    |                                                                                                                                                                                                                                                                                          |   |   |   |   |   |   |   |   |   |   |   |   |   |   |   |   |   |   |   |   |   |   |   |   |   |   |   |   |
|----|----------------------------------------------------|------------------------------------------------------------------------------------------------------------------------------------------------------------------------------------------------------------------------------------------------------------------------------------------|---|---|---|---|---|---|---|---|---|---|---|---|---|---|---|---|---|---|---|---|---|---|---|---|---|---|---|---|
| 26 | Develop and implement tools for quality monitoring | Develop, test, and introduce into quality-monitoring systems the right input—the appropriate language, protocols, algorithms, standards, and measures (of processes, patient/consumer outcomes, and implementation outcomes) that are often specific to the innovation being implemented |   |   |   |   |   |   |   |   |   |   |   |   |   |   |   |   |   |   |   |   |   |   |   |   |   |   |   |   |
|    |                                                    |                                                                                                                                                                                                                                                                                          | 0 | 0 | 0 | 1 | 0 | 0 | 0 | 0 | 0 | 0 | 0 | 0 | 0 | 0 | 0 | 0 | 0 | 0 | 0 | 1 | 0 | 0 | 0 | 0 | 0 | 1 | 0 | 3 |
| 27 | Develop and organize quality monitoring systems    | Develop and organize systems and procedures that monitor clinical processes and/or outcomes for the purpose of quality assurance and improvement                                                                                                                                         |   |   |   |   |   |   |   |   |   |   |   |   |   |   |   |   |   |   |   |   |   |   |   |   |   |   |   |   |
|    |                                                    |                                                                                                                                                                                                                                                                                          | 0 | 0 | 0 | 1 | 0 | 0 | 0 | 0 | 0 | 0 | 0 | 1 | 1 | 0 | 0 | 0 | 0 | 1 | 0 | 1 | 1 | 0 | 1 | 0 | 0 | 0 | 1 | 1 |



|    |                                     |                                                                                                                                                                                                                    |   |   |   |   |   |   |   |   |   |   |   |   |   |   |   |   |   |   |   |   |   |   |   |   |   |   |   |    |    |
|----|-------------------------------------|--------------------------------------------------------------------------------------------------------------------------------------------------------------------------------------------------------------------|---|---|---|---|---|---|---|---|---|---|---|---|---|---|---|---|---|---|---|---|---|---|---|---|---|---|---|----|----|
| 28 | Develop disincentives               | Provide financial disincentives for failure to implement or use the clinical innovations                                                                                                                           | 0 | 0 | 0 | 0 | 0 | 0 | 0 | 0 | 0 | 0 | 0 | 0 | 0 | 0 | 0 | 0 | 0 | 0 | 0 | 0 | 0 | 0 | 0 | 0 | 0 | 0 | 0 |    |    |
| 29 | Develop educational materials       | Develop and format manuals, toolkits, and other supporting materials in ways that make it easier for stakeholders to learn about the innovation and for clinicians to learn how to deliver the clinical innovation | 1 | 1 | 1 | 1 | ; | 1 | 1 | 1 | 1 | 0 | 1 | 1 | 1 | 0 | 1 | 1 | 1 | 0 | 0 | 1 | 1 | 1 | 1 | 1 | 1 | 1 | 0 | 22 |    |
| 30 | Develop resource sharing agreements | Develop partnerships with organizations that have resources needed to implement the innovation                                                                                                                     | 1 | 1 | 0 | 1 | 0 | 1 | 1 | 1 | 0 | 1 | 1 | 0 | 1 | 1 | 0 | 1 | 1 | 0 | 0 | 1 | 1 | 0 | 1 | 1 | 1 | 0 | 1 | 0  | 18 |

|    |                                                                                                                          |   |   |   |   |   |   |   |   |   |   |   |   |   |   |   |   |   |   |   |   |   |   |   |   |   |   |   |    |   |    |
|----|--------------------------------------------------------------------------------------------------------------------------|---|---|---|---|---|---|---|---|---|---|---|---|---|---|---|---|---|---|---|---|---|---|---|---|---|---|---|----|---|----|
| 31 | Distribute educational materials (including guidelines, manuals, and toolkits) in person, by mail, and/or electronically | 1 | 1 | 1 | 1 | 1 | 1 | 1 | 1 | 1 | 0 | 1 | 1 | 1 | 0 | 1 | 1 | 1 | 0 | 1 | 1 | 1 | 1 | 1 | 1 | 0 | 1 | 0 | 23 |   |    |
| 32 | Facilitate relay of clinical data to providers                                                                           | 0 | 0 | 0 | 1 | 0 | 1 | 0 | 0 | 0 | 0 | 0 | 0 | 0 | 0 | 0 | 1 | 0 | 0 | 0 | 0 | 0 | 0 | 0 | 0 | 0 | 0 | 1 | 1  | 5 |    |
| 33 | Facilitation                                                                                                             | 0 | 0 | 1 | 0 | 1 | 0 | 0 | 0 | 0 | 0 | 1 | 1 | 1 | 0 | 0 | 0 | 0 | 0 | 0 | 0 | 1 | 1 | 1 | 0 | 0 | 1 | 0 | 1  | 1 | 11 |

[illegible]



|    |                                                                   |                                                                                                                                                                                              |   |   |   |   |   |   |   |   |   |   |   |   |   |   |   |   |   |   |   |   |   |   |   |   |   |   |   |   |    |    |
|----|-------------------------------------------------------------------|----------------------------------------------------------------------------------------------------------------------------------------------------------------------------------------------|---|---|---|---|---|---|---|---|---|---|---|---|---|---|---|---|---|---|---|---|---|---|---|---|---|---|---|---|----|----|
| 38 | Inform local opinion leaders                                      | Inform providers identified by colleagues as opinion leaders or “educationally influential” about the clinical innovation in the hopes that they will influence colleagues to adopt it       | 1 | 0 | 1 | 1 | 1 | 0 | 1 | 0 | 0 | 0 | 0 | 0 | 0 | 1 | 0 | 0 | 0 | 0 | 0 | 1 | 1 | 1 | 1 | 0 | 0 | 0 | 1 | 1 | 12 |    |
| 39 | Intervene with patients/consumers to enhance uptake and adherence | Develop strategies with patients to encourage and problem solve around adherence                                                                                                             | 0 | 0 | 0 | 0 | 1 | 0 | 0 | 1 | 0 | 0 | 1 | 1 | 0 | 1 | 0 | 1 | 0 | 1 | 0 | 1 | 1 | 1 | 1 | 1 | 1 | 1 | 0 | 0 | 0  | 13 |
| 40 | Involve executive boards                                          | Involve existing governing structures (e.g., boards of directors, medical staff boards of governance) in the implementation effort, including the review of data on implementation processes | 0 | 0 | 0 | 1 | 0 | 1 | 1 | 1 | 0 | 1 | 0 | 1 | 0 | 1 | 0 | 1 | 0 | 0 | 0 | 0 | 1 | 1 | 1 | 1 | 1 | 1 | 0 | 1 | 0  | 14 |

[illegible]

|    |                                                       |                                                                                                                                                                                                             |   |   |   |   |   |   |   |   |   |   |   |   |   |   |   |   |   |   |   |   |   |   |   |   |   |   |   |   |    |
|----|-------------------------------------------------------|-------------------------------------------------------------------------------------------------------------------------------------------------------------------------------------------------------------|---|---|---|---|---|---|---|---|---|---|---|---|---|---|---|---|---|---|---|---|---|---|---|---|---|---|---|---|----|
| 46 | Obtain and use patients/consumers and family feedback | Develop strategies to increase patient/consumer and family feedback on the implementation effort                                                                                                            | 0 | 0 | 0 | 0 | 0 | 1 | 0 | 0 | 0 | 0 | 0 | 0 | 1 | 0 | 0 | 0 | 0 | 0 | 0 | 0 | 1 | 1 | 0 | 1 | 1 | 0 | 1 | 0 | 7  |
| 47 | Obtain formal commitments                             | Obtain written commitments from key partners that state what they will do to implement the innovation                                                                                                       | 1 | 1 | 0 | 1 | 0 | 0 | 0 | 1 | 0 | 0 | 0 | 0 | 0 | 0 | 0 | 1 | 0 | 0 | 0 | 1 | 1 | 1 | 0 | 1 | 1 | 0 | 1 | 1 | 12 |
| 48 | Organize clinician implementation team meetings       | Develop and support teams of clinicians who are implementing the innovation and give them protected time to reflect on the implementation effort, share lessons learned, and support one another's learning | 0 | 0 | 0 | 0 | 0 | 0 | 0 | 0 | 0 | 0 | 1 | 0 | 0 | 1 | 0 | 0 | 0 | 0 | 1 | 0 | 1 | 0 | 0 | 0 | 0 | 1 | 1 | 6 |    |

|    |                                                       |                                                                                                                                                                                                                      |   |   |   |   |   |   |   |   |   |   |   |   |   |   |   |   |   |   |   |   |   |   |   |   |   |   |   |
|----|-------------------------------------------------------|----------------------------------------------------------------------------------------------------------------------------------------------------------------------------------------------------------------------|---|---|---|---|---|---|---|---|---|---|---|---|---|---|---|---|---|---|---|---|---|---|---|---|---|---|---|
| 49 | Place innovation on fee for service lists/formularies | Work to place the clinical innovation on lists of actions for which providers can be reimbursed (e.g., a drug is placed on a formula, a procedure is now reimbursable)                                               | 0 | 0 | 0 | 0 | 0 | 0 | 0 | 0 | 0 | 0 | 0 | 0 | 0 | 0 | 0 | 0 | 0 | 0 | 0 | 0 | 0 | 0 | 0 | 0 | 0 | 0 |   |
| 50 | Prepare patients/consumers to be active participants  | Prepare patients/consumers to be active in their care, to ask questions, and specifically to inquire about care guidelines, the evidence behind clinical decisions, or about available evidence-supported treatments | 0 | 0 | 0 | 0 | 0 | 0 | 0 | 0 | 0 | 0 | 0 | 0 | 0 | 1 | 0 | 1 | 0 | 1 | 1 | 0 | 0 | 1 | 0 | 0 | 0 | 0 | 5 |





|    |                                    |                                                                                                                                                                            |   |   |   |   |   |   |   |   |   |   |   |   |   |   |   |   |   |   |   |   |   |   |   |   |   |   |   |   |    |
|----|------------------------------------|----------------------------------------------------------------------------------------------------------------------------------------------------------------------------|---|---|---|---|---|---|---|---|---|---|---|---|---|---|---|---|---|---|---|---|---|---|---|---|---|---|---|---|----|
| 53 | Provide clinical supervision       | Provide clinicians with ongoing supervision focusing on the innovation. Provide training for clinical supervisors who will supervise clinicians who provide the innovation | 0 | 0 | 0 | 0 | 1 | 1 | 1 | 1 | 0 | 0 | 0 | 0 | 1 | 0 | 0 | 0 | 1 | 0 | 0 | 1 | 1 | 0 | 0 | 1 | 1 | 0 | 1 | 1 | 12 |
| 54 | Provide local technical assistance | Develop and use a system to deliver technical assistance focused on implementation issues using local personnel                                                            | 0 | 0 | 0 | 0 | 1 | 1 | 0 | 1 | 0 | 0 | 1 | 0 | 1 | 0 | 0 | 0 | 0 | 0 | 0 | 0 | 1 | 1 | 0 | 1 | 0 | 1 | 0 | 1 | 11 |
| 55 | Provide ongoing consultation       | Provide ongoing consultation with one or more experts in the strategies used to support implementing the innovation                                                        | 0 | 0 | 0 | 1 | 1 | 0 | 1 | 0 | 0 | 0 | 0 | 0 | 0 | 0 | 0 | 0 | 0 | 0 | 0 | 0 | 1 | 0 | 0 | 0 | 1 | 0 | 1 | 0 | 6  |

|    |                                              |                                                                                                                              |   |   |   |   |   |   |   |   |   |   |   |   |   |   |   |   |   |   |   |   |   |   |   |   |   |   |   |   |   |   |
|----|----------------------------------------------|------------------------------------------------------------------------------------------------------------------------------|---|---|---|---|---|---|---|---|---|---|---|---|---|---|---|---|---|---|---|---|---|---|---|---|---|---|---|---|---|---|
| 56 | Purposely reexamine the implementation       | Monitor progress and adjust clinical practices and implementation strategies to continuously improve the quality of care     | 0 | 0 | 0 | 1 | 1 | 1 | 0 | 0 | 0 | 0 | 0 | 0 | 0 | 0 | 0 | 0 | 0 | 0 | 0 | 1 | 1 | 0 | 1 | 0 | 0 | 0 | 0 | 1 | 1 | 8 |
| 57 | Recruit, designate, and train for leadership | Recruit, designate, and train leaders for the change effort                                                                  | 0 | 0 | 0 | 1 | 0 | 0 | 1 | 0 | 0 | 0 | 0 | 1 | 0 | 1 | 0 | 0 | 0 | 0 | 0 | 0 | 0 | 0 | 0 | 0 | 0 | 0 | 0 | 0 | 0 | 4 |
| 58 | Remind clinicians                            | Develop reminder systems designed to help clinicians to recall information and/or prompt them to use the clinical innovation | 0 | 0 | 0 | 0 | 0 | 0 | 0 | 0 | 0 | 0 | 0 | 0 | 0 | 0 | 0 | 0 | 0 | 0 | 0 | 0 | 0 | 0 | 0 | 0 | 0 | 0 | 0 | 0 | 0 | 0 |
| 59 | Revise professional roles                    | Shift and revise roles among professionals who provide care, and redesign job characteristics                                | 0 | 0 | 0 | 0 | 0 | 0 | 0 | 0 | 0 | 0 | 0 | 1 | 0 | 0 | 0 | 0 | 0 | 0 | 0 | 0 | 0 | 0 | 0 | 0 | 0 | 0 | 0 | 1 | 0 | 2 |

|    |                                      |                                                                                                                                                              |   |   |   |   |   |   |   |   |   |   |   |   |   |   |   |   |   |   |   |   |   |   |   |   |   |   |   |    |
|----|--------------------------------------|--------------------------------------------------------------------------------------------------------------------------------------------------------------|---|---|---|---|---|---|---|---|---|---|---|---|---|---|---|---|---|---|---|---|---|---|---|---|---|---|---|----|
| 60 | Shadow other experts                 | Provide ways for key individuals to directly observe experienced people engage with or use the targeted practice change/innovation                           | 0 | 0 | 0 | 0 | 0 | 0 | 0 | 0 | 0 | 0 | 0 | 1 | 0 | 0 | 0 | 0 | 0 | 0 | 0 | 0 | 0 | 0 | 0 | 0 | 0 | 0 | 1 |    |
| 61 | Stage implementation scale up        | Phase implementation efforts by starting with small pilots or demonstration projects and gradually move to a system wide rollout                             | 1 | 1 | 1 | 1 | 1 | 1 | 1 | 0 | 1 | 1 | 1 | 0 | 1 | 1 | 1 | 1 | 0 | 0 | 1 | 0 | 1 | 1 | 1 | 1 | 0 | 1 | 1 | 22 |
| 62 | Start a dissemination or- ganization | Identify or start a separate organization that is responsible for disseminating the clinical innovation. It could be a for-profit or non-profit organization | 0 | 0 | 0 | 1 | 0 | 0 | 0 | 0 | 0 | 0 | 0 | 0 | 0 | 0 | 0 | 0 | 0 | 0 | 0 | 0 | 0 | 0 | 0 | 0 | 1 | 0 | 0 | 2  |

|    |                                    |                                                                                                                                                                         |   |   |   |   |   |   |   |   |   |   |   |   |   |   |   |   |   |   |   |   |   |   |   |   |   |   |   |   |    |
|----|------------------------------------|-------------------------------------------------------------------------------------------------------------------------------------------------------------------------|---|---|---|---|---|---|---|---|---|---|---|---|---|---|---|---|---|---|---|---|---|---|---|---|---|---|---|---|----|
| 63 | Tailor strategies                  | Tailor the implementation strategies to address barriers and leverage facilitators that were identified through earlier data collection                                 | 0 | 0 | 0 | 1 | 1 | 1 | 1 | 1 | 1 | 0 | 1 | 1 | 0 | 1 | 1 | 1 | 0 | 1 | 0 | 1 | 1 | 1 | 1 | 1 | 1 | 1 | 1 | 1 | 21 |
| 64 | Use advisory boards and workgroups | Create and engage a formal group of multiple kinds of stakeholders to provide input and advice on implementation efforts and to elicit recommendations for improvements | 1 | 0 | 0 | 1 | 1 | 1 | 0 | 0 | 0 | 1 | 0 | 1 | 0 | 0 | 0 | 1 | 0 | 0 | 0 | 1 | 1 | 0 | 0 | 1 | 1 | 0 | 1 | 0 | 12 |
| 65 | Use an implementation advisor      | Seek guidance from experts in implementation                                                                                                                            | 0 | 0 | 0 | 0 | 0 | 1 | 0 | 1 | 0 | 0 | 0 | 0 | 0 | 0 | 0 | 0 | 0 | 0 | 0 | 0 | 0 | 0 | 0 | 0 | 0 | 0 | 0 | 0 | 2  |
| 66 | Use capitated payments             | Pay providers or care systems a set amount per patient/consumer for delivering clinical care                                                                            | 0 | 0 | 0 | 0 | 0 | 0 | 1 | 0 | 0 | 0 | 0 | 0 | 0 | 0 | 1 | 0 | 0 | 0 | 0 | 0 | 0 | 1 | 0 | 0 | 0 | 0 | 0 | 0 | 3  |

|    |                                  |                                                                                                                   |   |   |   |   |   |   |   |   |   |   |   |   |   |   |   |   |   |   |   |   |   |   |   |   |   |   |   |   |   |    |
|----|----------------------------------|-------------------------------------------------------------------------------------------------------------------|---|---|---|---|---|---|---|---|---|---|---|---|---|---|---|---|---|---|---|---|---|---|---|---|---|---|---|---|---|----|
| 67 | Use data experts                 | Involve, hire, and/or consult experts to inform management on the use of data generated by implementation efforts | 0 | 0 | 0 | 0 | 0 | 0 | 0 | 0 | 0 | 0 | 0 | 0 | 0 | 0 | 0 | 0 | 1 | 0 | 0 | 1 | 0 | 0 | 0 | 0 | 0 | 0 | 1 | 0 | 3 |    |
| 68 | Use data warehousing techniques  | Integrate clinical records across facilities and organizations to facilitate implementation across systems        | 0 | 0 | 0 | 0 | 0 | 0 | 0 | 0 | 0 | 0 | 0 | 0 | 0 | 0 | 0 | 0 | 0 | 0 | 0 | 0 | 0 | 0 | 0 | 0 | 0 | 0 | 0 | 0 | 0 |    |
| 69 | Use mass media                   | Use media to reach large numbers of people to spread the word about the clinical innovation                       | 1 | 0 | 1 | 0 | 1 | 1 | 1 | 1 | 1 | 0 | 1 | 1 | 1 | 0 | 1 | 1 | 0 | 1 | 0 | 1 | 1 | 1 | 1 | 1 | 1 | 1 | 1 | 1 | 1 | 22 |
| 70 | Use other payment schemes        | Introduce payment approaches (in a catch-all category)                                                            | 0 | 0 | 0 | 0 | 0 | 0 | 0 | 1 | 0 | 0 | 0 | 0 | 0 | 0 | 0 | 0 | 0 | 0 | 0 | 0 | 0 | 0 | 0 | 0 | 0 | 0 | 0 | 0 | 1 |    |
| 71 | Use train-the-trainer strategies | Train designated clinicians or organizations to train others in the clinical innovation                           | 0 | 0 | 0 | 1 | 0 | 1 | 0 | 0 | 0 | 0 | 0 | 0 | 0 | 0 | 0 | 0 | 0 | 0 | 0 | 1 | 0 | 0 | 0 | 0 | 1 | 0 | 1 | 0 | 5 |    |

|                                                         |                                                                                                      |    |    |    |    |    |    |    |    |    |    |    |    |    |    |    |    |    |    |   |    |    |    |    |    |    |   |    |    |     |
|---------------------------------------------------------|------------------------------------------------------------------------------------------------------|----|----|----|----|----|----|----|----|----|----|----|----|----|----|----|----|----|----|---|----|----|----|----|----|----|---|----|----|-----|
| 72                                                      | Visit other sites where a similar im-<br>plementation effort<br>has been<br>considered<br>successful | 0  | 0  | 0  | 0  | 1  | 0  | 0  | 0  | 0  | 0  | 0  | 0  | 0  | 0  | 0  | 1  | 1  | 1  | 0 | 1  | 0  | 1  | 0  | 1  | 0  | 0 | 1  | 0  | 8   |
| 73                                                      | Work with edu-<br>cational institu-<br>tions to train cli-<br>nicians in the inno-<br>vation         | 0  | 0  | 0  | 0  | 0  | 0  | 0  | 0  | 0  | 0  | 0  | 0  | 0  | 0  | 0  | 0  | 0  | 0  | 0 | 0  | 0  | 0  | 0  | 0  | 0  | 0 | 1  | 0  | 1   |
| Total<br>number of<br>strategies<br>used per<br>article |                                                                                                      | 22 | 14 | 17 | 39 | 19 | 32 | 22 | 25 | 12 | 10 | 23 | 31 | 16 | 15 | 20 | 32 | 16 | 20 | 2 | 44 | 40 | 31 | 28 | 29 | 31 | 6 | 45 | 26 | 667 |

**Table S4.** Implementation strategies used ERIC clusters according to feasibility and importance.

| Implementation strategies                                     | No. of times identified | Go-Zone Quadrant Feasibility and Importance |
|---------------------------------------------------------------|-------------------------|---------------------------------------------|
| 1. Use evaluative and iterative strategies                    | 113                     |                                             |
| 4 Assess for readiness and identify barriers and facilitators |                         |                                             |
| 5 Audit and provide feedback                                  | 19                      | 1                                           |
| 56 Purposefully re-examine the implementation                 | 12                      | 1                                           |
| 26 Develop and implement tools for quality monitoring         | 8                       | 1                                           |
| 27 Develop and organize quality monitoring systems            | 3                       | 1                                           |
| 23 Develop a formal implementation blueprint                  | 9                       | 1                                           |
| 18 Conduct local needs assessment                             | 13                      | 1                                           |
| 61 Stage implementation scale up                              | 12                      | 1                                           |
| 46 Obtain and use patients/consumers and family feedback      | 22                      | 1                                           |
| 14 Conduct cyclical small tests of change                     | 7                       | 1                                           |
| 2. Provide interactive assistance                             | 8                       | 1                                           |
| 33 Facilitation                                               | 51                      |                                             |
| 54 Provide local technical assistance                         | 11                      | 1                                           |
| 53 Provide clinical supervision                               | 12                      | IV                                          |
| 8 Centralize technical assistance                             | 11                      | IV                                          |
| 3. Adapt and tailor to context                                | 17                      | III                                         |
| 63 Tailor strategies                                          | 45                      |                                             |
| 51 Promote adaptability                                       | 21                      | I                                           |
| 67 Use data experts                                           | 21                      | I                                           |
| 68 Use data warehousing techniques                            | 3                       | III                                         |
| 4. Develop stakeholder interrelationships                     | 0                       | III                                         |
| 35 Identify and prepare champions                             | 164                     |                                             |
| 48 Organize clinician implementation team meetings            | 9                       | I                                           |
| 57 Recruit, designate, and train for leadership               | 6                       | I                                           |
| 38 Inform local opinion leaders                               | 4                       | IV                                          |
| 6 Build a coalition                                           | 12                      | I                                           |
| 47 Obtain formal commitments                                  | 24                      | I                                           |
| 36 Identify early adopters                                    | 12                      | IV                                          |
| 17 Conduct local consensus discussions                        | 2                       | I                                           |
| 7 Capture and share local knowledge                           | 20                      | I                                           |
| 64 Use advisory boards and workgroups                         | 12                      | I                                           |
| 65 Use an implementation advisor                              | 12                      | I                                           |
| 45 Model and simulate change                                  | 2                       | I                                           |
| 72 Visit other sites                                          | 0                       | II                                          |
| 40 Involve executive boards                                   | 8                       | II                                          |
| 25 Develop an implementation glossary                         | 14                      | II                                          |
| 24 Develop academic partnerships                              | 2                       | II                                          |
| 52 Promote network weaving                                    | 3                       | II                                          |
| 5. Train and educate stakeholders                             | 22                      | III                                         |
| 19 Conduct ongoing training                                   | 131                     |                                             |
| 55 Provide ongoing consultation                               | 11                      | I                                           |
|                                                               | 6                       | I                                           |



|                                 |                                                                   |    |     |
|---------------------------------|-------------------------------------------------------------------|----|-----|
| 29                              | Develop educational materials                                     | 22 | I   |
| 43                              | Make training dynamic                                             | 12 | I   |
| 31                              | Distribute educational materials                                  | 23 | I   |
| 71                              | Use train-the-trainer strategies                                  | 4  | I   |
| 15                              | Conduct educational meetings                                      | 23 | I   |
| 16                              | Conduct educational outreach visits                               | 16 | II  |
| 20                              | Create a learning collaborative environment                       | 11 | II  |
| 60                              | Shadow other experts                                              | 1  | II  |
| 73                              | Work with educational institutions                                | 1  | II  |
| 6. Support clinicians           |                                                                   | 26 |     |
| 32                              | Facilitate relay of clinical data to providers                    | 5  | I   |
| 58                              | Remind clinicians                                                 | 0  | II  |
| 30                              | Develop resource sharing agreements                               | 18 | III |
| 59                              | Revise professional roles                                         | 2  | III |
| 21                              | Create new clinical teams                                         | 1  | III |
| 7. Engage consumers             |                                                                   | 65 |     |
| 41                              | Involve patients/consumers and family members                     | 22 | I   |
| 39                              | Intervene with patients/consumers to enhance uptake and adherence | 13 | IV  |
| 50                              | Prepare patients/consumers to be active participants              | 5  | IV  |
| 37                              | Increase demand                                                   | 3  | II  |
| 69                              | Use mass media                                                    | 22 | III |
| 8. Utilize financial strategies |                                                                   | 27 |     |
| 34                              | Fund and contract for the clinical innovation                     | 0  | IV  |
| 1                               | Access new funding                                                | 21 | IV  |
| 49                              | Place innovation on fee for service lists/formularies             | 0  | IV  |
| 2                               | Alter incentive/allowance structures                              | 0  | III |
| 42                              | Make billing easier                                               | 2  | III |
| 3                               | Alter patient/consumer fees                                       | 3  | III |
| 70                              | Use other payment schemes                                         | 1  | III |
| 28                              | Develop disincentives                                             | 0  | III |
| 66                              | Use capitated payments                                            | 0  | III |
| 9. Change infrastructure        |                                                                   | 46 |     |
| 44                              | Mandate change                                                    |    |     |
| 12                              | Change record systems                                             | 10 | III |
| 11                              | Change physical structure and equipment                           | 1  | III |
| 22                              | Create or change credentialing and/or licensure standards         | 5  | III |
| 13                              | Change service sites                                              | 3  | III |
| 9                               | Change accreditation or membership requirements                   | 22 | III |
| 62                              | Start a dissemination organization                                | 0  | III |
| 10                              | Change liability laws                                             | 2  | III |

The rightmost column depicts the go-zone quadrant into which each strategy falls based on the scale mean cut-offs. Go-zone quadrant I: Importance and feasibility are both above the scale means. Go-zone quadrant II: Importance rating is lower and the feasibility rating is higher than the scale means. Go-zone quadrant III: Importance and feasibility ratings are both below scale means. Go-zone quadrant IV: Importance rating higher and feasibility lower than scale means according to Waltz et al.
